# Supplementary material
Source: publisher figshare collection journal article supplement (https://gsajournals.figshare.com/ndownloader/files/14564882)
Supplement: Supplementary file 1 [file 14564882]

**Table S1. Primers used for mapping experiments**

| Gene name: | Primer Set: |
| --- | --- |
| CG40178 | CTTATATCCTTAACGCACTTATCTTCTGCC / GTTATAGCCACTGCGGCAGAATCCCGATACC |
| CG17514 | TAGTAGACCTTGTAACTATTCATCACG / GGCTTCGCAATATAGACCTCTGTAAAG |
| eIF-4B | CAAAATTTCCAACTGTTTCTTTAGGATG / ACCACTTCCATCATCGCTATCATCG |
| CG40300 | TGACATTCTTCCCTGATATCCTGAG / AGCATTGTCCTTGTACAAGAAGAC |
| CG17698 | TCATTGTTTACTTCTAGGGATCCTA / ACAATATTCCAATCCAAGTAAAGACTC |
| CG40001 | GCAATTTGGGGACACGTCCGGAATAAACCG / TTCAATTATGAACTGCTGCTTTACAACTCC |
| CG41347 | CGGGCTAGTTGAGAACTGTTTTGCGTTGTCC / CGCAACCCAAAGCTGGACTCTGGTGCAC |
| scro | ACTTTATCGGGTTGGAATACTTCCTTCTGC / GAATTCGTATCGGTATATCCACTCTCATTC |
| nAchRa4 | CGACTTGCCTAAATCTCCTAATCT  CCCAAAAAACGACGAACTGA |
| rpl15 | CCGTGCTGTAAGTTGGTTGT / GTACCGATAAGCCCCCATC |
| rad21 | TTAAAATGTTCTATGAGCACA / CTTAATCTTGACAAAGGCTTC |
| CG17374 | CAACTGCAAGATTGAAAATTCCTCCCACTGG / ATCTAAGCTGATACTTGACTCCGAGATCGG |
| dSet1 | AGGTTTGTTCATAATTGACACAGATGC / TCATACCTTTCCCATTACAGACTTTTG |
| mRpS5 | AGCTTAGACTTCTTGGGAACTGC / TTGGGCAAAGCAACAACTAATTG |
| nvd | GCTGACGACTGTGTTATATGCCCTTTTCATCAATGG  CCATTGATGAAAAGGGCATATAACACAGTCGTCAGC |
| CG40002 | GAC GCA AGT TCT GGA ACA C / GAA CAC CCA ACT CTG TG TTG C |
| CG15848/scp1(ch 2) | GACGAGGACCGGAAACGTG / GAGAGAACGCCAACTCTATATCCTA |
| ucrh | CAT TGT GAT TGC ATC ATA GCG / GCA AAT GCA TTG CAT AAG CG |
| med21 | GCA GAC TAC TTG GAG ACC AAC / GAA CGA AAA TGC AAT AAA TAC ATT ATC |
| CG15848/scp1(ch 2) | GACGAGGACCGGAAACGTG / GAGAGAACGCCAACTCTATATCCTA |
| GFP | CAAGAGCGCCATGCCCGAAG / CAGGGCCATCGCCAATAG |
| Grp84 | ACGCTTCTCGCTGATGGAC / GTCGCAGTAACTGGATTGAGT |
